# Supplementary material
Source: PubMed Central journal article supplement (PMC5069517)

**SUPPORTING INFORMATION**

Community trait overdispersion due to trophic interactions - concerns  
for assembly process inference

Mikael Pontarp<sup>1,2</sup> and Owen L Petchey<sup>1</sup>

<sup>1</sup>Department of Evolutionary Biology and Environmental Studies, University of Zurich,  
Winterthurerstrasse 190, 8057 Zurich, Switzerland

<sup>2</sup> Department of Ecology and Environmental Science, Umeå University, 90187 Umeå, Sweden

Article DOI: [10.1098/rspb](https://doi.org/10.1098/rspb)

## Appendix 1

### Tables

**Table S1** Parameter values used in the competitive community assembly (second column) and trophic consumer invasion simulations (third column). Single value denotes constant parameter and ranges denotes parameter space analyzed. Note that parameters associated with predators was not used in competitive community assembly.

| Parameter       | Competitive community assembly | Trophic consumer invasion |
|-----------------|--------------------------------|---------------------------|
| $r$             | 1                              | 1                         |
| $K$             | 300                            | 300                       |
| $b_{con}$       | 0.005                          | 0.005                     |
| $m_{con}$       | 0.1                            | 0.1                       |
| $c_{con}$       | 0.15                           | 0.15                      |
| $m_{pred}$      | ---                            | 0.1                       |
| $c_{pred}$      | ---                            | 0.15                      |
| $w$             | 20-100                         | 25, 100                   |
| $\sigma_{cons}$ | 0-2                            | 0.5, 2                    |
| $C_{pred}$      | ---                            | 0-0.2                     |
| $\sigma_{pred}$ | ---                            | 0.2                       |

### Figure legends

#### *Figure S1a*

Population dynamics for one competitor consumer (a) and the resource community (b) at the invasion of the first consumer. Consumer fitness landscape (c) and trait distribution of the consumer (d) and the resource community (e) at equilibrium after the first consumer has invaded. Simulation was run with

consumer niche width = 1 and island width at 90% of the species pool. Other parameters:  $r = 1$ ,  $K = 300$ ,  $b_{con} = 0.005$ ,  $m_{con} = 0.1$  and  $c_{con} = 0.15$ .

### ***Figure S1b***

Population dynamics for the two competitive consumers (a) and the resource community (b) after a second competitive consumer invades the system of figure S1a. Consumer fitness landscape (c) and trait distribution of the consumer (d) and the resource community (e) at equilibrium after the second consumer has invaded. Simulation was run with consumer niche width = 1 and island width at 90% of the species pool. Other parameters:  $r = 1$ ,  $K = 300$ ,  $b_{con} = 0.005$ ,  $m_{con} = 0.1$  and  $c_{con} = 0.15$ .

### ***Figure S2a***

Assembled reference competitive consumer community of 20 species; fitness landscape (a), consumer abundance and traits (b), and resource abundance and traits (c), before any trophic consumers invaded. Consumer niche width = 1 and island width at 90% of the species pool. Other parameters:  $r = 1$ ,  $K = 300$ ,  $b_{con} = 0.005$ ,  $m_{con} = 0.1$  and  $c_{con} = 0.15$ .

### ***Figure S2b***

Population dynamics for two trophic consumers (i.e., predators) (a), the competitive consumer community (b) and the resource community (c) at the invasion of the second predator (green line). Predator fitness landscape (d) and trait distribution (e) at equilibrium after the second predator has invaded. Consumer fitness landscape (f) and trait distributions of the consumer (g) and resource (h) communities at equilibrium after the second predator has invaded. Red X in (g) denotes positions in trait space where a competitive consumer species has gone extinct. Simulation was run with consumer niche width = 1, island width at 90% of the species pool, predator niche width = 0.3 and predator efficiency = 0.03.

### ***Figure S3***

Mean consumer community structure (contour) measures as MTD (c,d) and MNTD (e) as a function of niche width (x-axis) and the overlap between resource width in trait space on the island and the trait distribution of competitor species (y-axis). For the 100% scenario all competitive consumers in the

species pool have suitable resources on the island and could potentially invade (low degree of habitat filtering) while for the 25% scenario a small proportion could invade (high habitat filtering). Top panels (a, b) show diversity. Simulations with 500 (a, c, e) and 100 (b, d) species in the species pool. Red lines highlight regional in parameter space with unexpected results showing positive relationship between competition and community clustering. The results are based on 50 replicated simulations.

#### ***Figure S4***

Contour plots of the effect of 1-5 (column panels 1-5) predators on the number of extinctions (row panels 1), change in community MTD (row panels 2), MTD after predator invasion (row panels 3), change in MNTD (row panels 4) and MNTD after predator invasion (row panels 5). Here the reference consumer community has a low degree of clustering (Island width = 100% and Consumer niche width = 2). The results are based on 50 replicated simulations.

#### ***Figure S5***

Contour plots of the effect of 1-5 (column panels 1-5) predators on the number of extinctions (row panels 1), change in community MTD (row panels 2), MTD after predator invasion (row panels 3), change in MNTD (row panels 4) and MNTD after predator invasion (row panels 5). Here the reference consumer community has a high degree of clustering (Island width = 25% and Consumer niche width = 0.5). Missing data can occur in parts (grid regions) of parameter space as communities with a certain (high) number of invading predators never were obtained in simulations. The results are based on 50 replicated simulations.

#### ***Figure S6***

Contour plots of the effect of 1-5 (column panels 1-5) predators on the number of extinctions (row panels 1), change in community MTD (row panels 2) and MTD after predator invasion (row panels 3). Here the reference consumer community has a low degree of clustering (Island width = 100% and Consumer niche width = 0.5). Missing data can occur in parts of parameter space (grid region) as communities with a certain (high) number of invading predators never were obtained in simulations. The results are based on 10 replicated simulations.

### ***Figure S7***

Contour plots of the effect of 1-5 (column panels 1-5) predators on the number of extinctions (row panels 1), change in community MTD (row panels 2) and MTD after predator invasion (row panels 3). Here the reference consumer community has a high degree of clustering (Island width = 25% and Consumer niche width = 2). Missing data can occur in parts of parameter space (grid region) as communities with a certain (high) number of invading predators never were obtained in simulations. The results are based on 10 replicated simulations.

### ***Figure S8***

Contour plots of the effect of 1-3 (column panels 1-3) predators on the number of extinctions (row panel 1) and change in community MTD (row panel 2) in a reference consumer community. Here the reference consumer community has a high degree of clustering (Island width = 25% and Consumer niche width = 2). Note the reduction of parameter space (x- and y-axes ranges) when going from one to multiple invading predators. This is because multiple predators could not co-exist at high predator niche width and efficiency. Predators were only allowed to invade the peripheral parts of consumer trait space. Missing data can occur in parts of parameter space as communities with a certain (high) number of invading predators never were obtained in simulations. The results are based on 10 replicated simulations.

### ***Figure S9***

Contour plots of the effect of 1-3 (column panels 1-3) predators on the number of extinctions (row panel 1) and change in community MTD (row panel 2) in a reference consumer community. Here the reference consumer community has a low degree of clustering (Island width = 90% and Consumer niche width = 2). Note the reduction of parameter space (x- and y-axes ranges) when going from one to multiple invading predators. This is because multiple predators could not co-exist at high predator niche width and efficiency. Predators were only allowed to invade the peripheral parts of consumer trait space. The results are based on 10 replicated simulations.

# Figures

Figure S1a

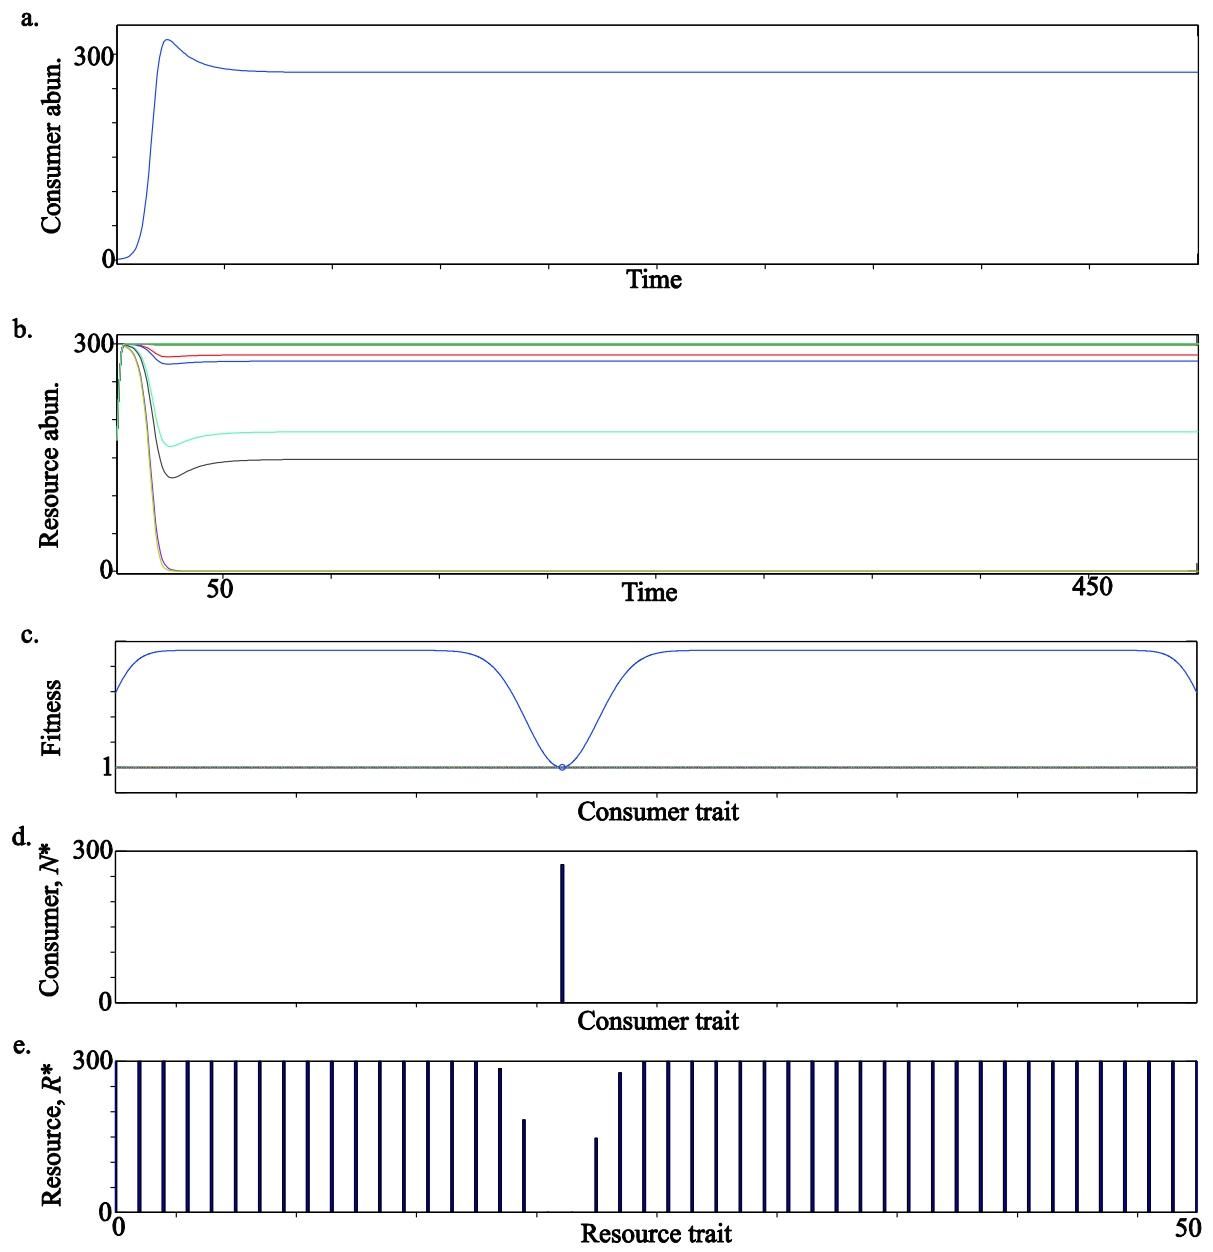

Figure S1b

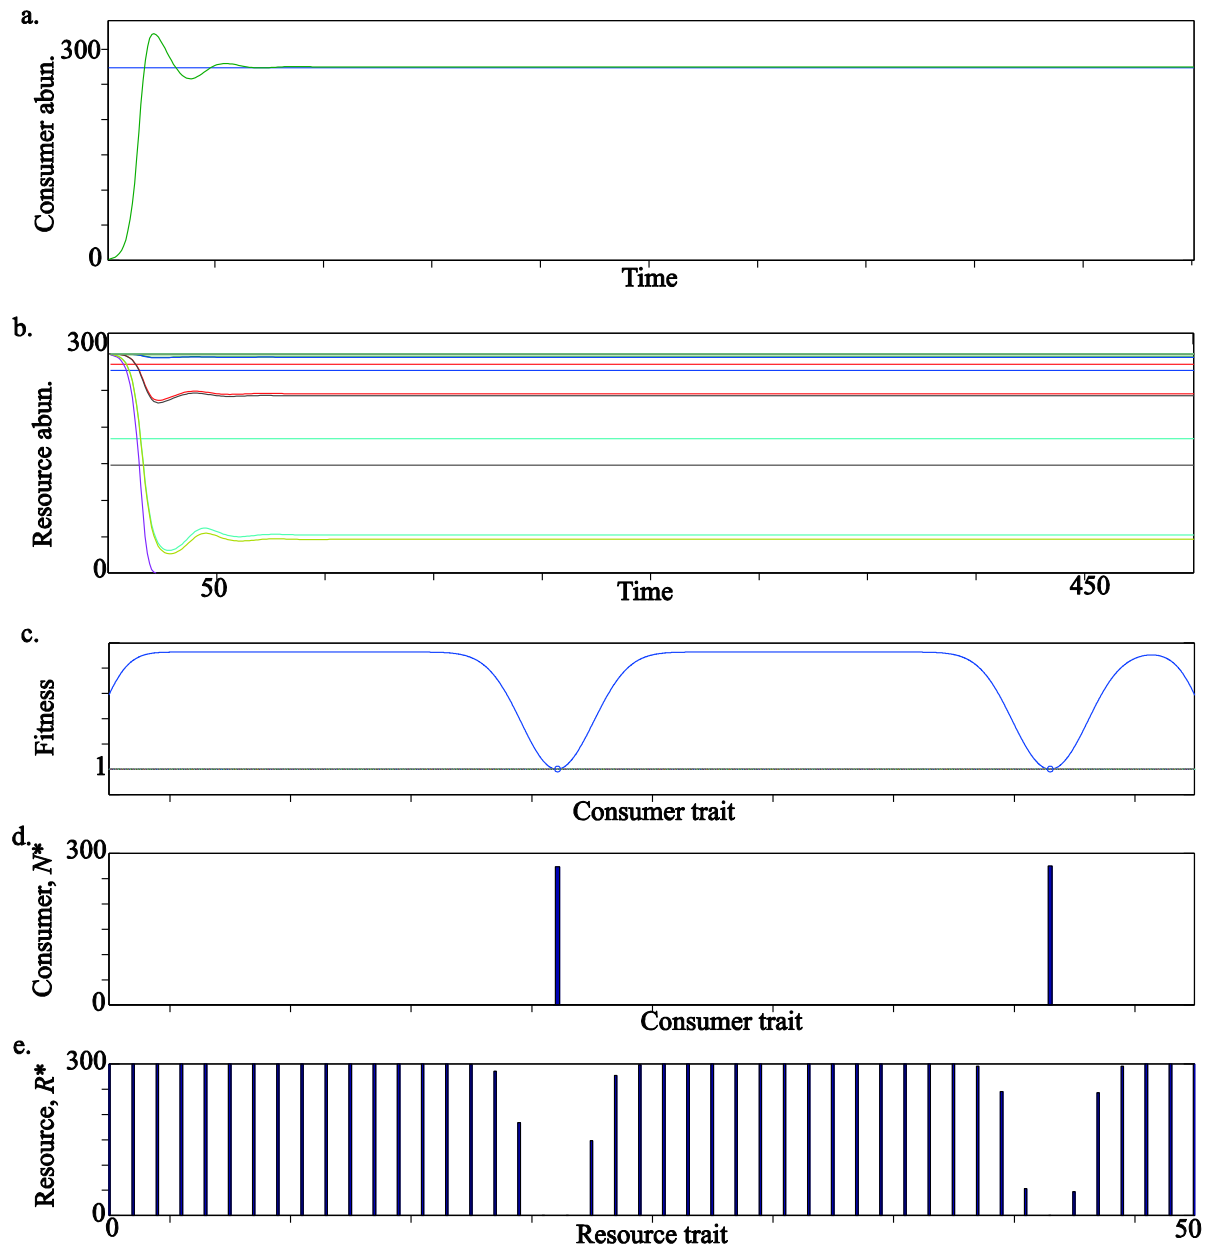

Figure S2a

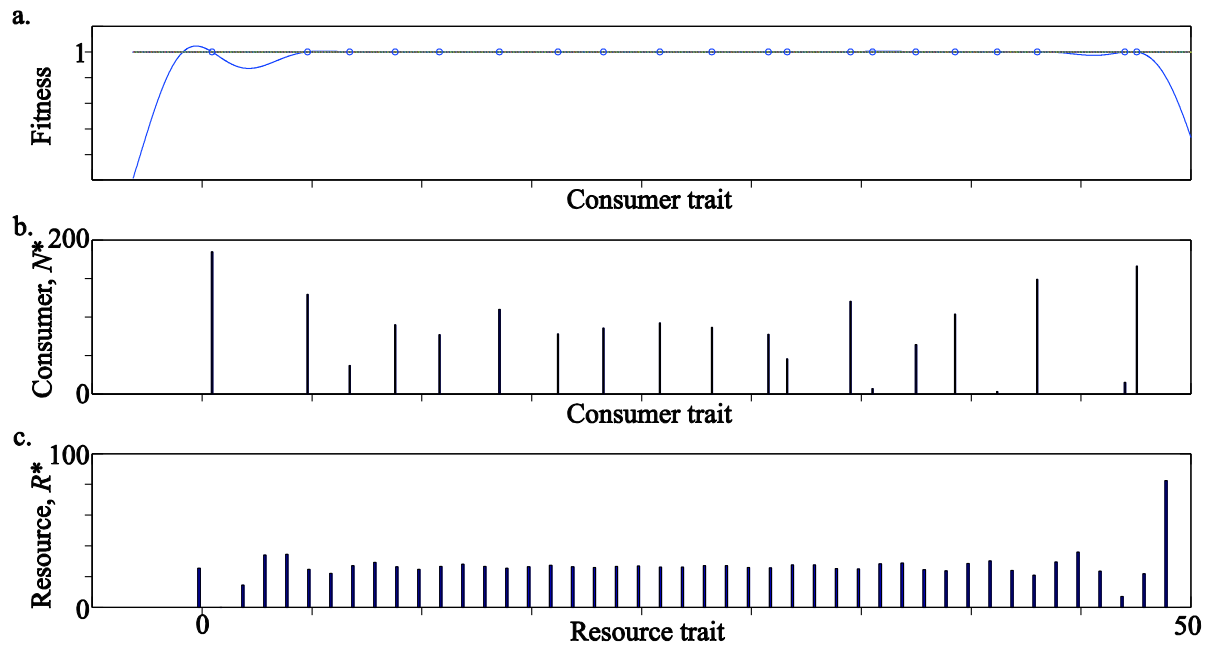



Figure S2b

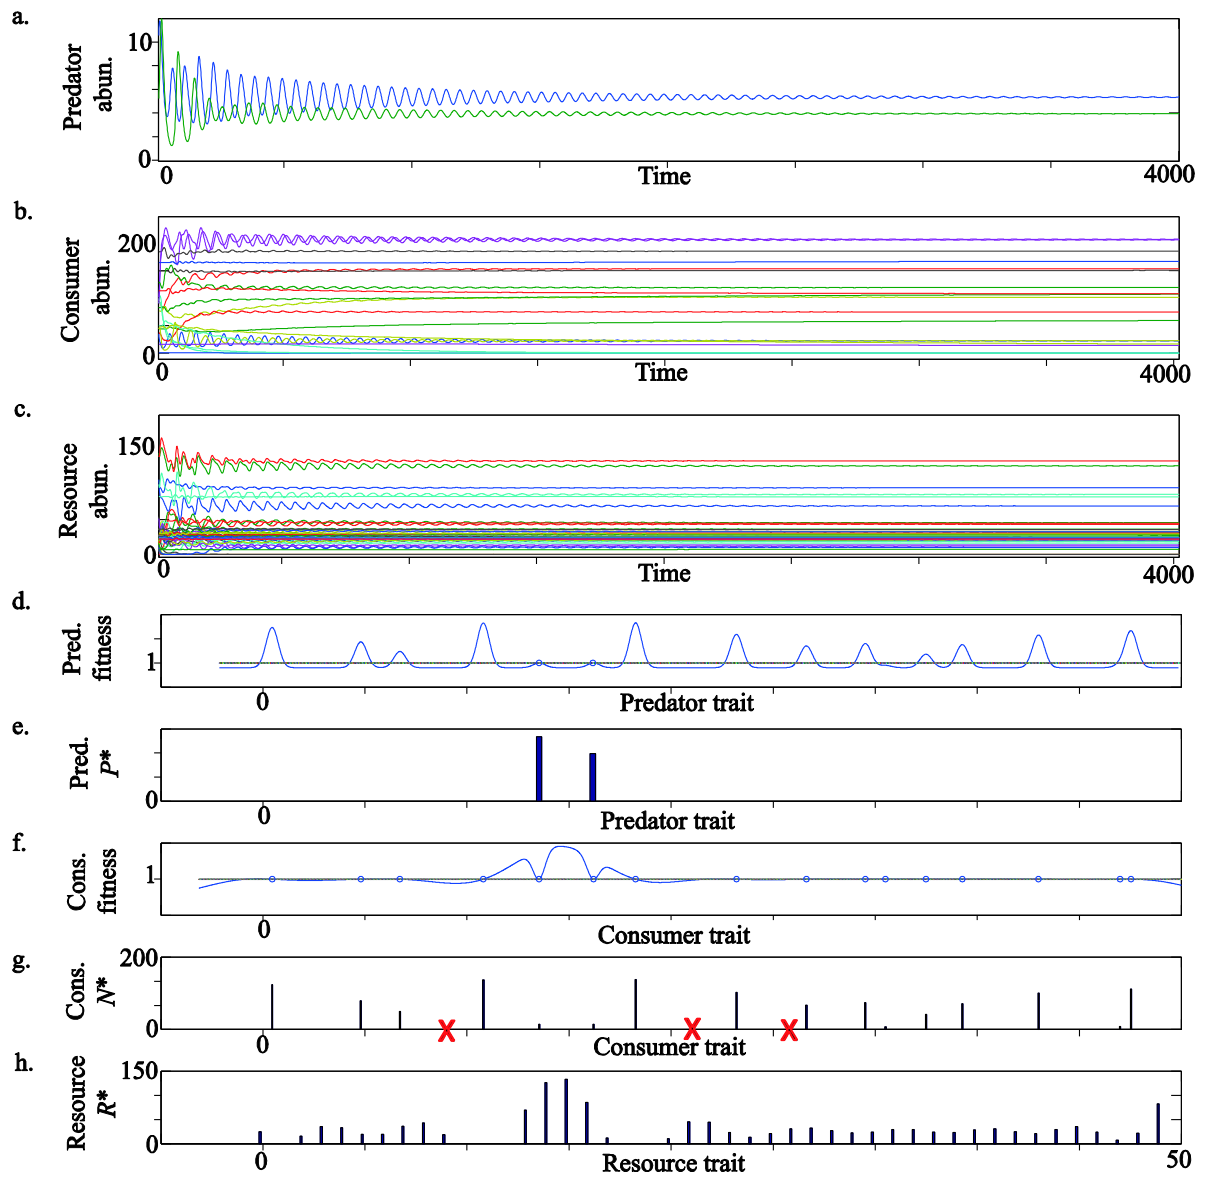

Figure S3

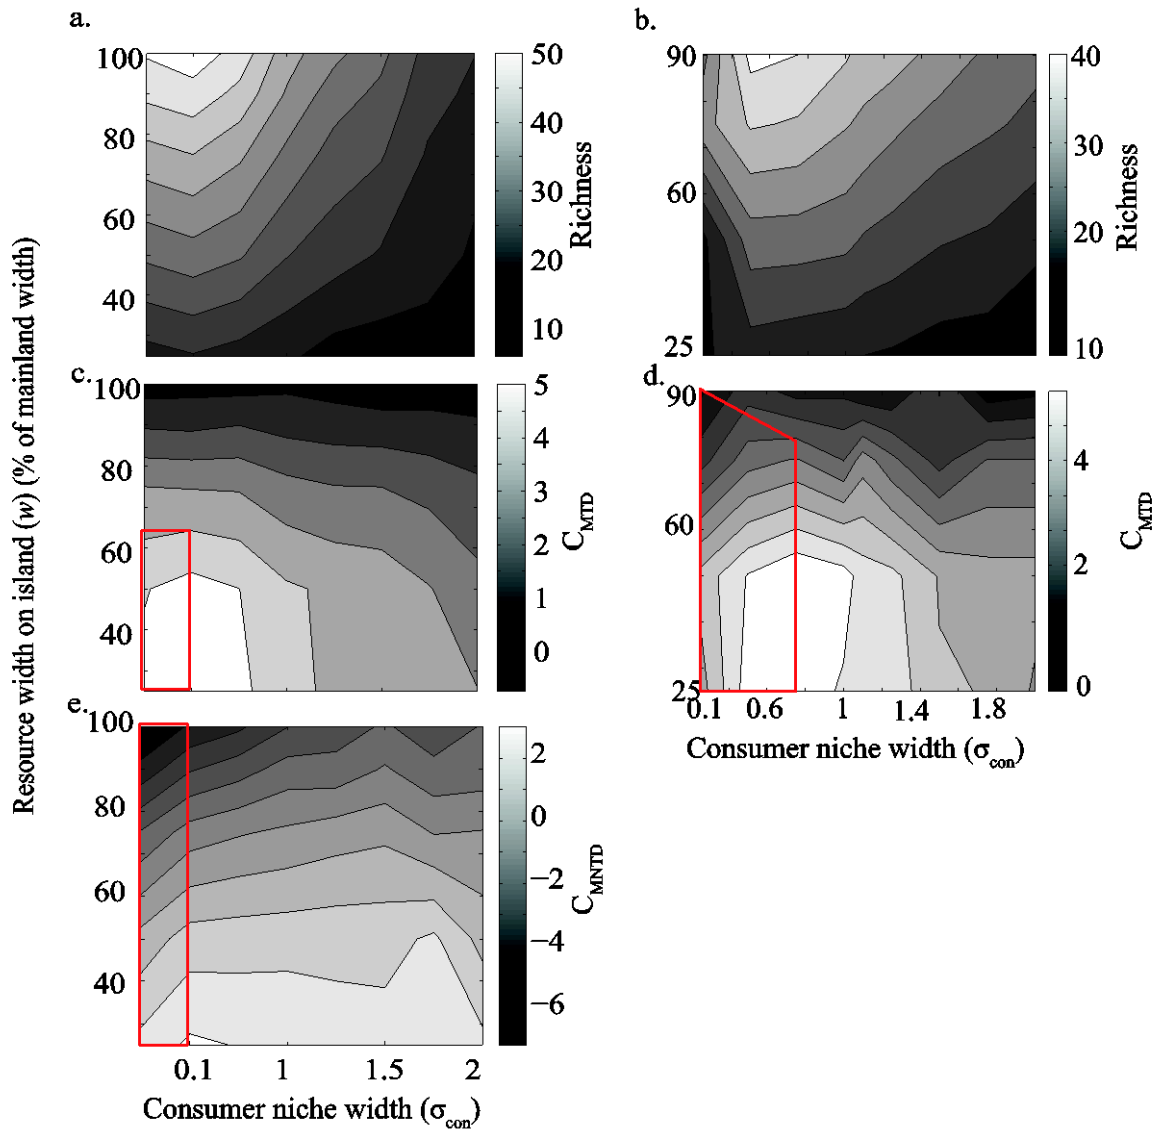

Figure S4

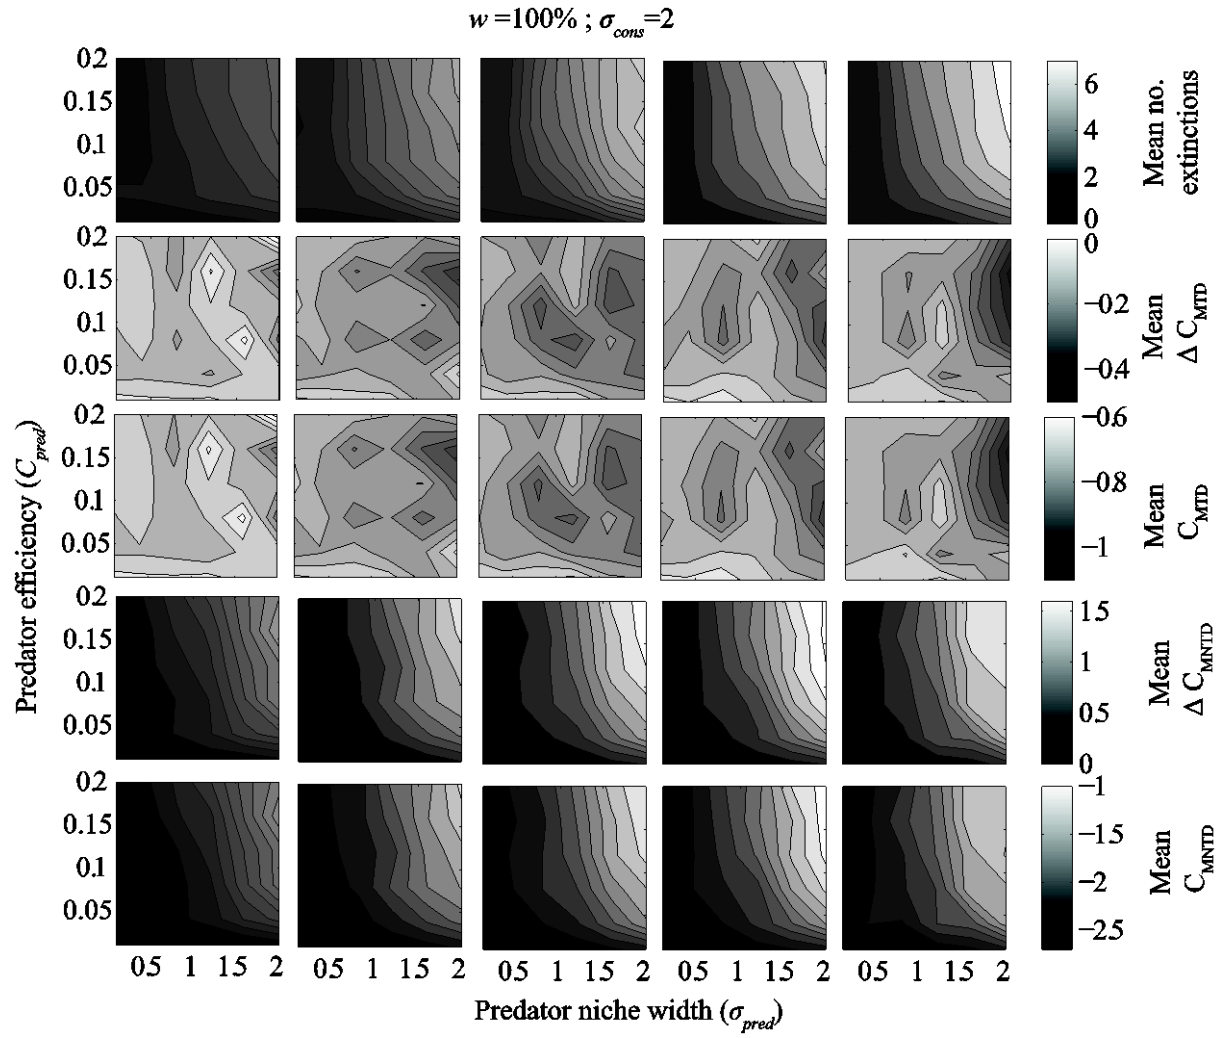

Figure S5

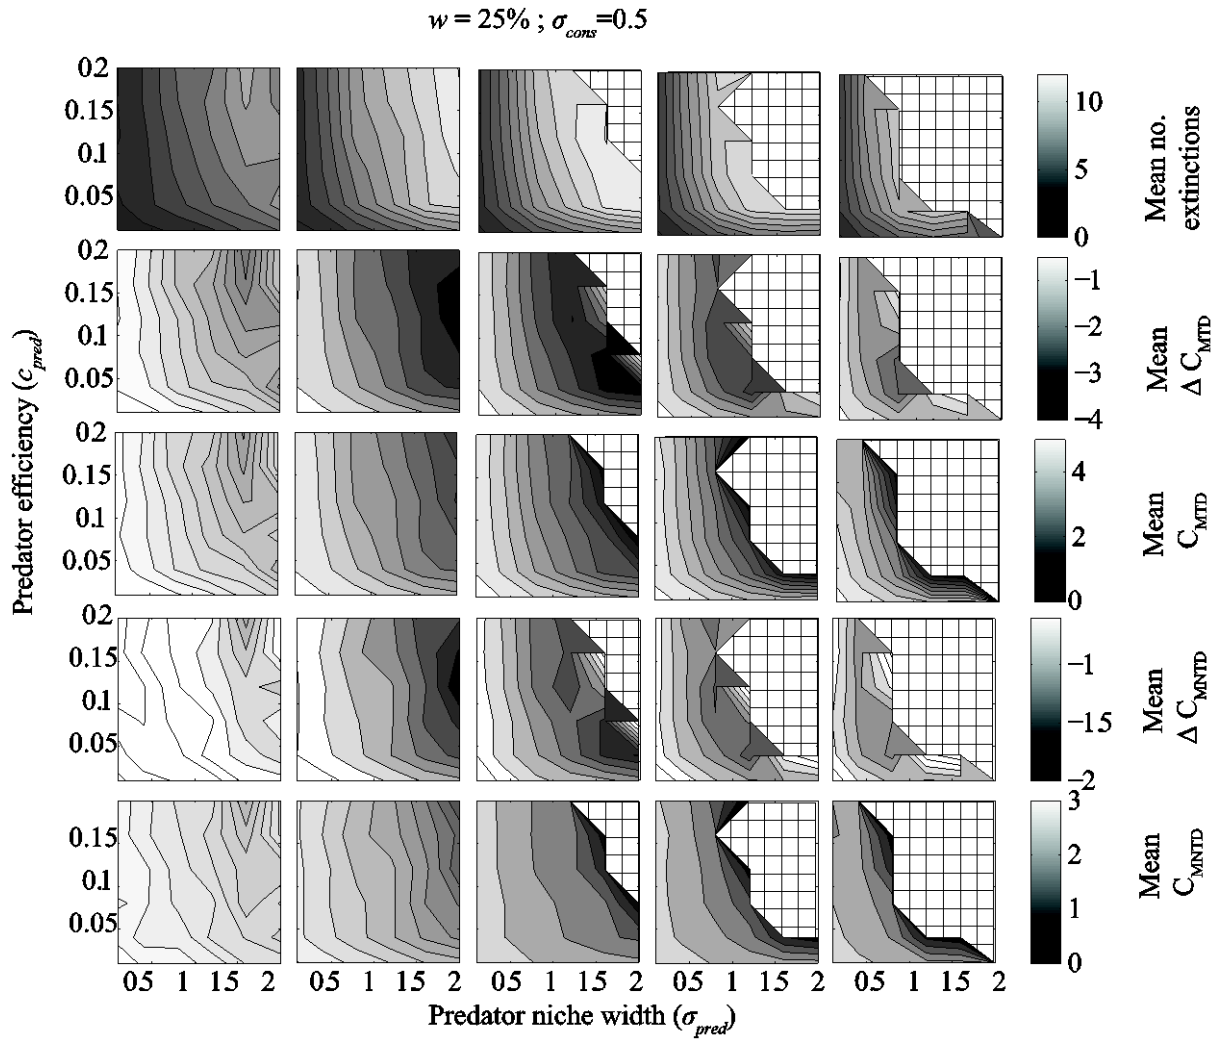

Figure S6

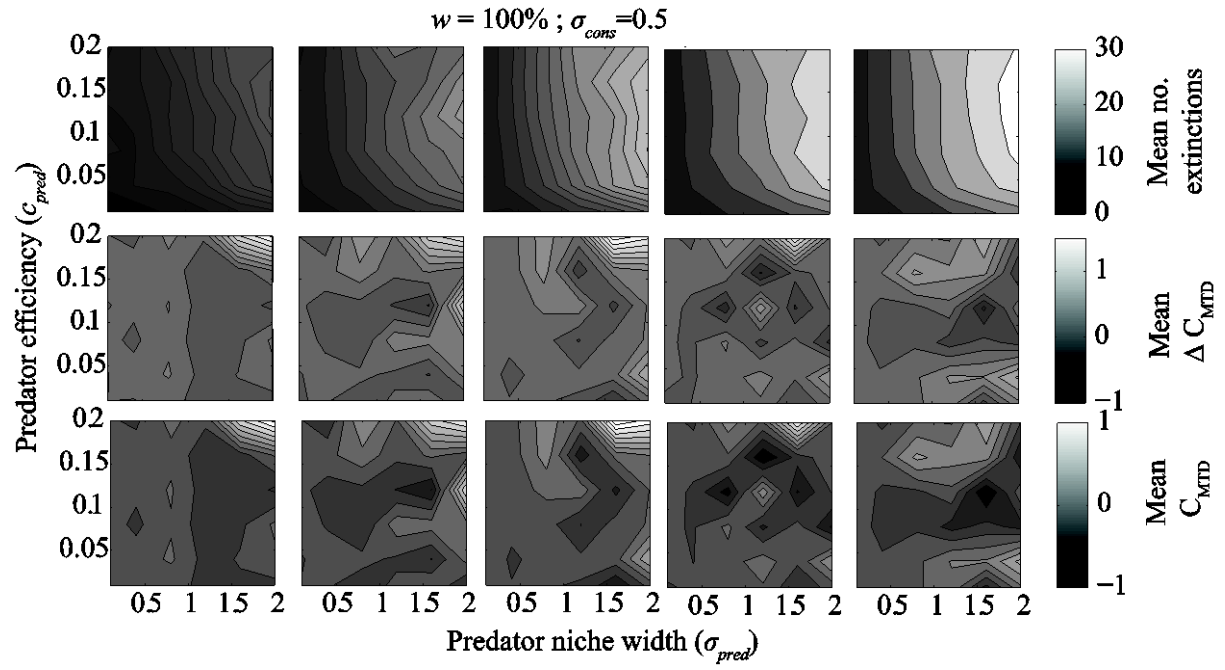

Figure S7

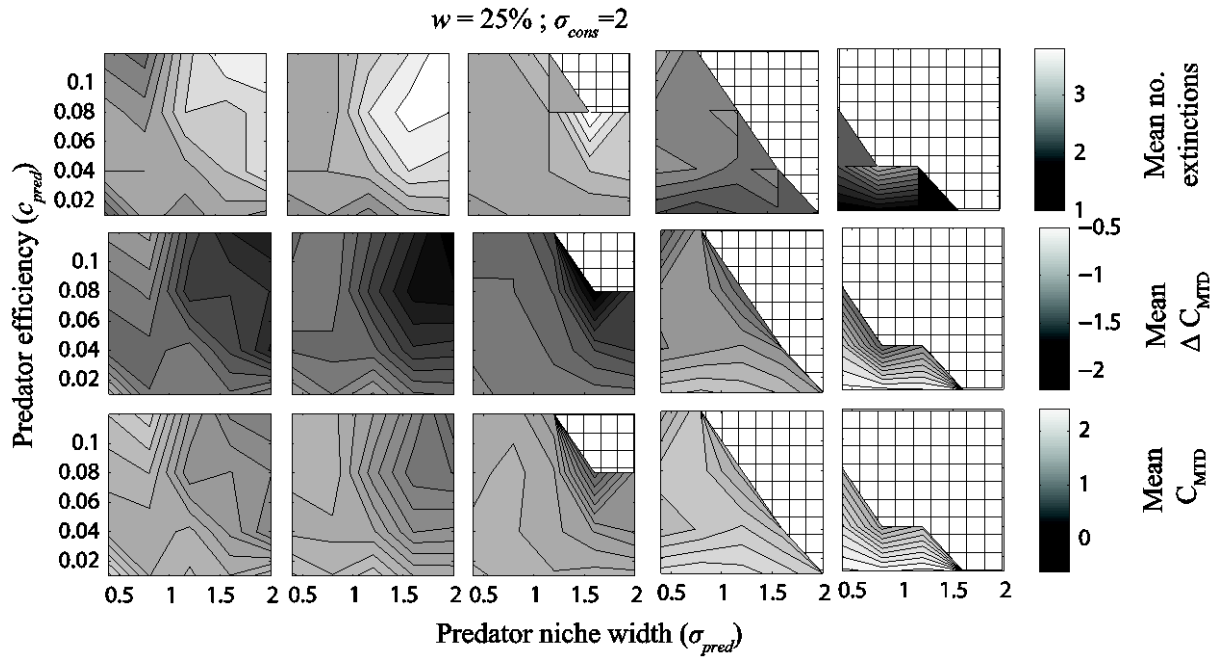

Figure S8

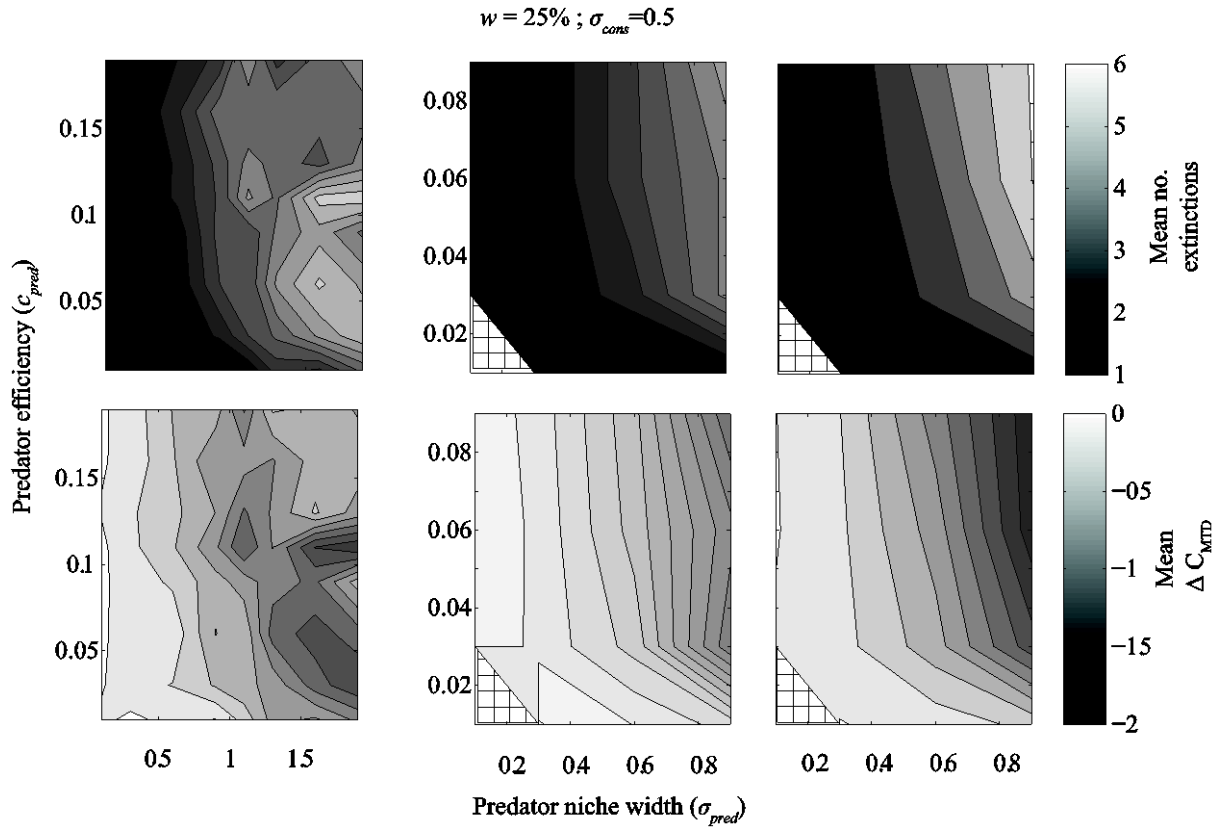

Figure S9

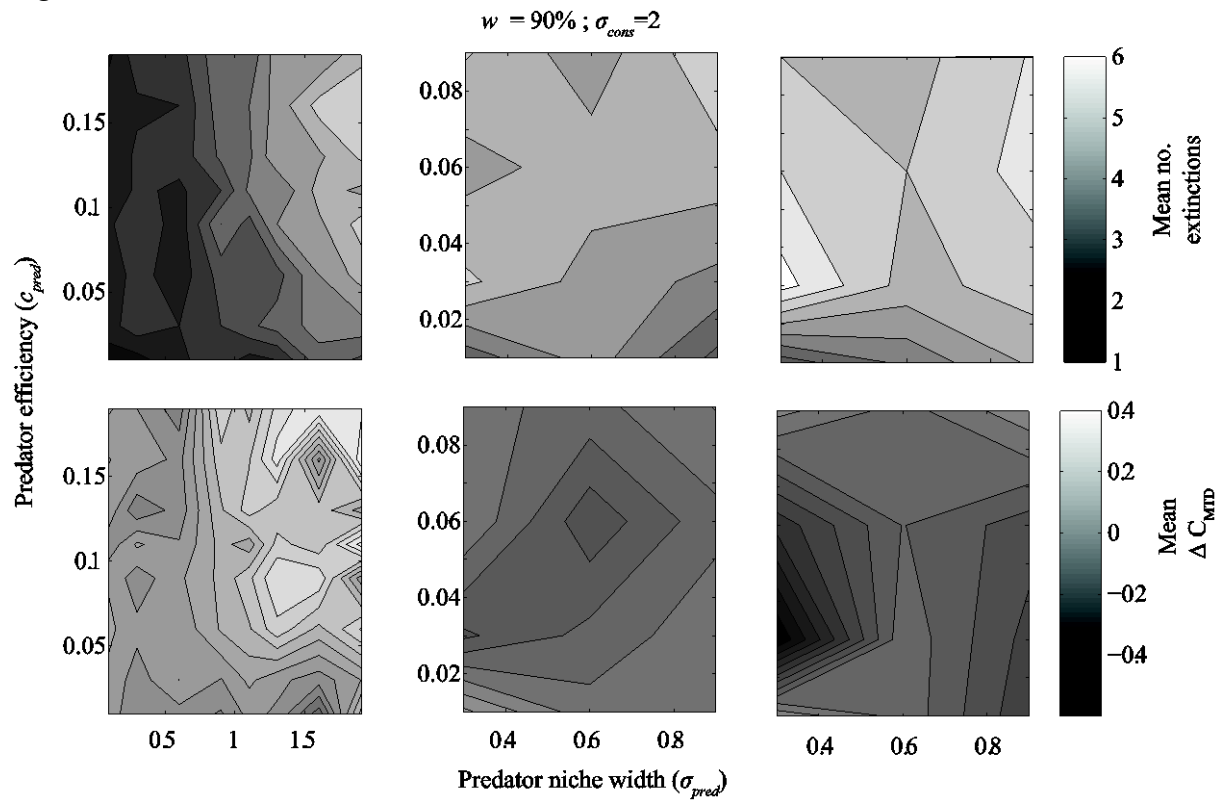

Supplement: rspb20161729supp1.pdf [file rspb20161729supp1.pdf]
